# Supplementary material for: IL-36α Promoted Wound Induced Hair Follicle Neogenesis via Hair Follicle Stem/Progenitor Cell Proliferation
Source: PubMed Central journal article supplement (PMC7493638; doi:10.3389/fcell.2020.00627), 2020-09-02
Supplement: Data_Sheet_1.pdf [file Data_Sheet_1.pdf]

## *Supplementary Material*

### 1 Supplementary Figures

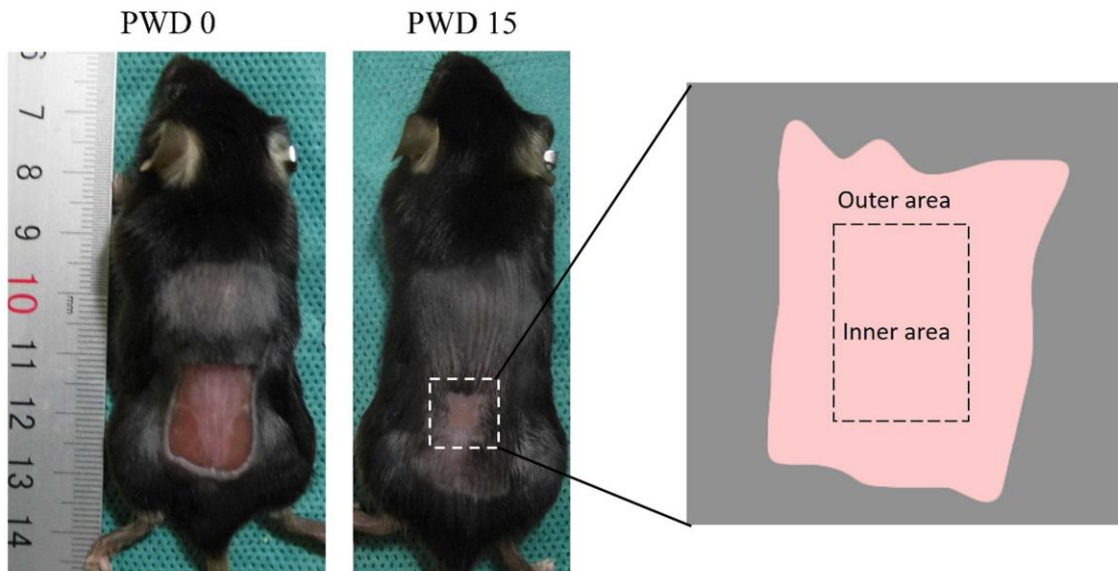

**Supplementary Figure 1.** Wound model photos at post-wound day (PWD) 0 and PWD 15. Inner and outer regions were separated along the black dashed line.

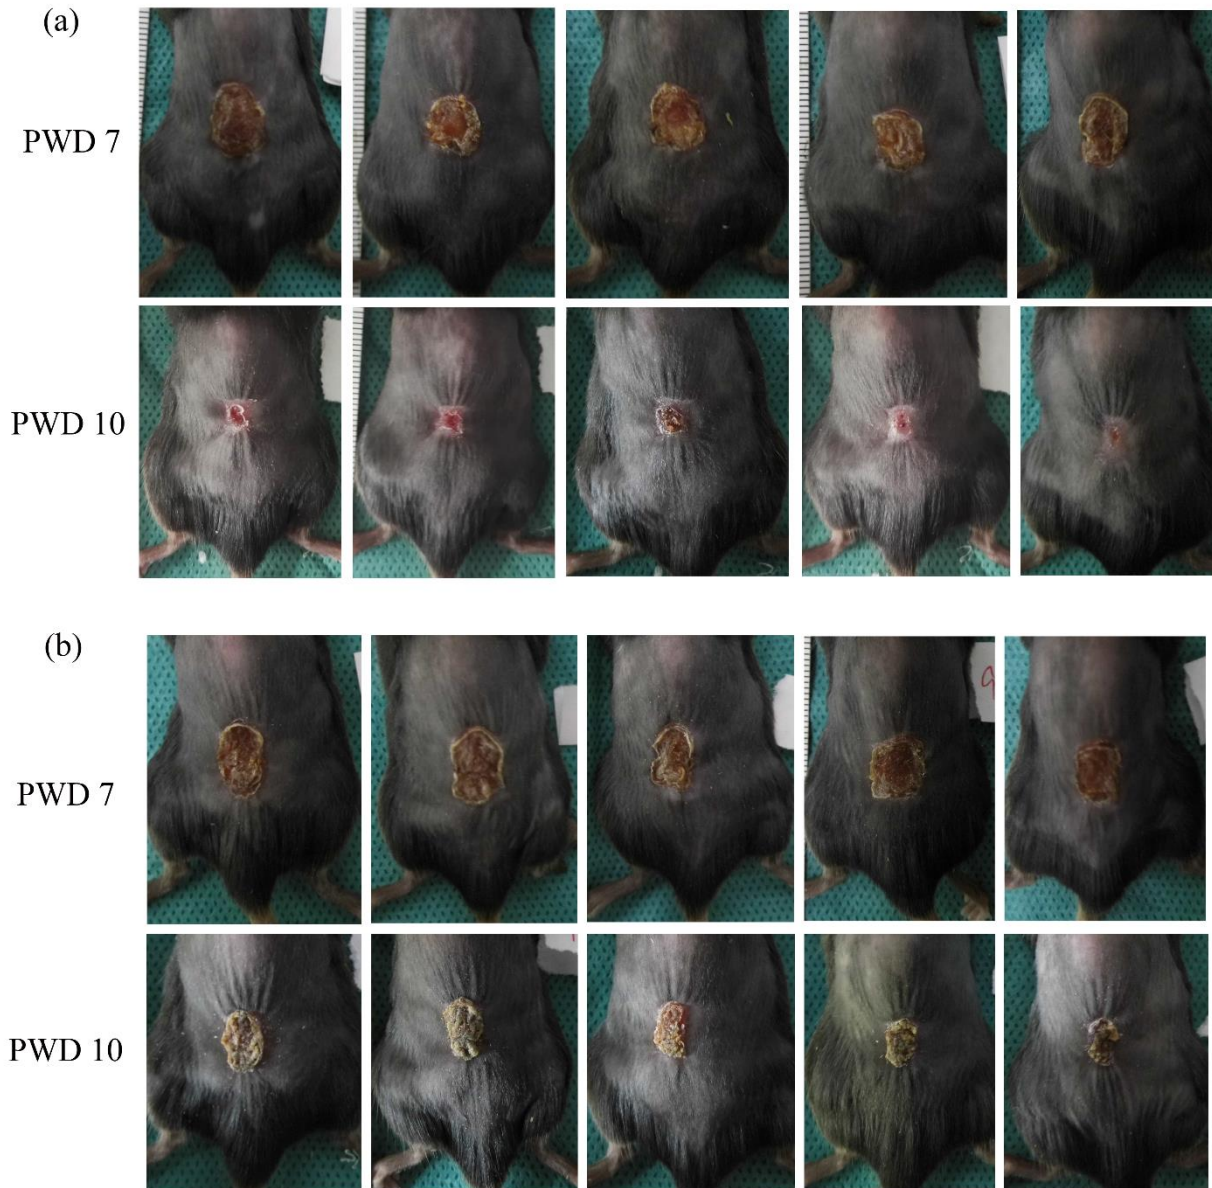

**Supplementary Figure 2.** mrIL-36 $\alpha$  or PBS was injected into healing wounds (beneath the scab) from PWD 7 to PWD 14. Wound model photos of mrIL-36 $\alpha$ -injected group (a) and control group (b).

## 2 Supplementary Tables

**Supplementary Table 1.** Primer sequences used for qPCR are provided.

| Gene           | Primer sequence                                                    |
|----------------|--------------------------------------------------------------------|
| Lgr5           | Forward: CCTACTCGAAGACTTACCCAGT<br>Reverse: GCATTGGGGTGAATGATAGCA  |
| Lgr6           | Forward: TCAGGGAACCACCTCTCACA<br>Reverse: CATAGTGCCTCTGCTGGGAT     |
| Lrig1          | Forward: TTGAGGACTTGACGAATCTGC<br>Reverse: CTTGTTGTGCTGCAAAAAGAGAG |
| K15            | Forward: AGATCGGGACTACAGCCATTAC<br>Reverse: AGGGTCAGCTCATTCTCATACT |
| CD34           | Forward: AAGGCTGGGTGAAGACCCTTA<br>Reverse: TGAATGGCCGTTTCTGGAAGT   |
| IL-36 $\alpha$ | Forward: GCAGCATCACCTTCGCTTAGA<br>Reverse: CAGATATTGGCATGGGAGCAAG  |
| IL-6           | Forward: CTGCAAGAGACTTCCATCCAG<br>Reverse: AGTGGTATAGACAGGTCTGTTGG |

**Supplementary Table 2.** Differentially expressed proteins (DEPs) between the inner and outer areas of the scar at PWD 15.

| Accession  | Gene Name | Description                                                                                  | FC       | P value  |
|------------|-----------|----------------------------------------------------------------------------------------------|----------|----------|
| Q61726     | Krt83     | Keratin type II (Fragment) OS=Mus musculus GN=Krt83 PE=2 SV=1                                | 4.875278 | 0.012515 |
| Q61FZ6     | Krt77     | Keratin, type II cytoskeletal 1b OS=Mus musculus GN=Krt77 PE=1 SV=1                          | 4.695016 | 0.001437 |
| Q8VCW2     | Krt25     | Keratin, type I cytoskeletal 25 OS=Mus musculus GN=Krt25 PE=1 SV=1                           | 4.690756 | 0.014254 |
| Q8VED5     | Krt79     | Keratin, type II cytoskeletal 79 OS=Mus musculus GN=Krt79 PE=1 SV=2                          | 4.386128 | 0.000993 |
| B7ZN13     | Aldh3a1   | Aldehyde dehydrogenase OS=Mus musculus GN=Aldh3a1 PE=2 SV=1                                  | 3.465496 | 0.000316 |
| Q05A13     | Sdr16c6   | Short-chain dehydrogenase/reductase family 16C member 6 OS=Mus musculus GN=Sdr16c6 PE=2 SV=1 | 3.306859 | 0.000439 |
| Q9R0H5     | Krt71     | Keratin, type II cytoskeletal 71 OS=Mus musculus GN=Krt71 PE=1 SV=1                          | 2.62385  | 0.012513 |
| Q7TNT2     | Far2      | Fatty acyl-CoA reductase 2 OS=Mus musculus GN=Far2 PE=2 SV=1                                 | 2.522687 | 2.69E-05 |
| Q9QWL7     | Krt17     | Keratin, type I cytoskeletal 17 OS=Mus musculus GN=Krt17 PE=1 SV=3                           | 2.503422 | 0.000464 |
| E9QK82     | Mpz       | Myelin protein P0 OS=Mus musculus GN=Mpz PE=1 SV=1                                           | 2.425743 | 0.017215 |
| Q3UFX6     | Mg11      | Putative uncharacterized protein OS=Mus musculus GN=Mg11 PE=2 SV=1                           | 2.333964 | 0.000464 |
| Q9D1H9     | Mfap4     | Microfibril-associated glycoprotein 4 OS=Mus musculus GN=Mfap4 PE=1 SV=1                     | 2.19034  | 1.55E-05 |
| AOA140LHD6 | Serpinh1  | Serpin H1 (Fragment) OS=Mus musculus GN=Serpinh1 PE=1 SV=1                                   | 2.16251  | 0.010913 |
| B2RU72     | Krt27     | Keratin 27 OS=Mus musculus GN=Krt27 PE=2 SV=1                                                | 2.161607 | 0.023779 |

|            |                   |                                                                                        |          |          |
|------------|-------------------|----------------------------------------------------------------------------------------|----------|----------|
| Q8ROF9     | Sec1414           | SEC14-like protein 4 OS=Mus musculus<br>GN=Sec1414 PE=1 SV=1                           | 2.000684 | 0.002855 |
| Q9EQR4     | Clca3a2           | Chloride channel calcium activated 2<br>OS=Mus musculus GN=Clca3a2 PE=1 SV=1           | 1.980923 | 0.000331 |
| Q5F2E4     | Alox12e           | Arachidonate lipoxygenase, epidermal<br>OS=Mus musculus GN=Alox12e PE=2 SV=1           | 1.933724 | 0.001578 |
| Q3TNA0     | Cyp4b1            | MCG1260 OS=Mus musculus GN=Cyp4b1 PE=1<br>SV=1                                         | 1.924366 | 2.74E-05 |
| Q3UIR3     | Dtx31             | E3 ubiquitin-protein ligase DTX3L OS=Mus<br>musculus GN=Dtx31 PE=1 SV=1                | 1.862903 | 0.00301  |
| Q8BRM1     | Faah              | Putative uncharacterized protein OS=Mus<br>musculus GN=Faah PE=2 SV=1                  | 1.850082 | 0.009373 |
| P07310     | Ckm               | Creatine kinase M-type OS=Mus musculus<br>GN=Ckm PE=1 SV=1                             | 1.839134 | 0.015723 |
| P54320     | Eln               | Elastin OS=Mus musculus GN=Eln PE=1 SV=2                                               | 1.814499 | 0.00042  |
| Q678L1     | Krt77             | Keratin 1b (Fragment) OS=Mus musculus<br>GN=Krt77 PE=2 SV=1                            | 1.791234 | 0.024315 |
| Q924Y0     | Bbox1             | Gamma-butyrobetaine dioxygenase OS=Mus<br>musculus GN=Bbox1 PE=1 SV=1                  | 1.770669 | 1.23E-05 |
| Q543S0     | Prelp             | Proline arginine-rich end leucine-rich<br>repeat OS=Mus musculus GN=Prelp PE=1<br>SV=1 | 1.759674 | 9.79E-05 |
| AOA0B6VJJ9 | Klk10             | Kallikrein related-peptidase 10 OS=Mus<br>musculus GN=Klk10 PE=2 SV=1                  | 1.756238 | 5.77E-05 |
| O35233     | Aff1              | MAF4 (Fragment) OS=Mus musculus GN=Aff1<br>PE=2 SV=1                                   | 1.749513 | 0.015991 |
| Q3UMM7     | Adh7              | Putative uncharacterized protein OS=Mus<br>musculus GN=Adh7 PE=2 SV=1                  | 1.73014  | 6.35E-06 |
| P31428     | Dpep1             | Dipeptidase 1 OS=Mus musculus GN=Dpep1<br>PE=1 SV=2                                    | 1.726985 | 0.014108 |
| E9PVG8     | 9530053A07<br>Rik | Protein 9530053A07Rik OS=Mus musculus<br>GN=9530053A07Rik PE=1 SV=1                    | 1.686411 | 0.030853 |

## Supplementary Material

|        |               |                                                                                         |          |          |
|--------|---------------|-----------------------------------------------------------------------------------------|----------|----------|
| E9Q9C6 | Fcgbp         | Protein Fcgbp OS=Mus musculus GN=Fcgbp PE=1 SV=1                                        | 1.677492 | 0.001655 |
| Q9EQC4 | Elov14        | Elongation of very long chain fatty acids protein 4 OS=Mus musculus GN=Elov14 PE=1 SV=2 | 1.651468 | 0.002227 |
| Q9WVH9 | Fbln5         | Fibulin-5 OS=Mus musculus GN=Fbln5 PE=1 SV=1                                            | 1.634456 | 5.02E-05 |
| E9QPZ3 | Flg2          | Filaggrin-2 OS=Mus musculus GN=Flg2 PE=1 SV=1                                           | 1.629405 | 0.020832 |
| E9Q4S3 | Nin           | Ninein OS=Mus musculus GN=Nin PE=1 SV=1                                                 | 1.62158  | 0.011784 |
| Q9QUJ7 | Acs14         | Long-chain-fatty-acid--CoA ligase 4 OS=Mus musculus GN=Acs14 PE=1 SV=2                  | 1.610979 | 0.036452 |
| P06330 | #N/A          | Ig heavy chain V region AC38 205.12 OS=Mus musculus PE=1 SV=1                           | 1.58366  | 0.010799 |
| Q69ZX3 | Myh11         | MKIAA0866 protein (Fragment) OS=Mus musculus GN=Myh11 PE=2 SV=1                         | 1.583033 | 7.73E-05 |
| O35452 | Tnxb          | Protein Tnxb OS=Mus musculus GN=Tnxb PE=1 SV=1                                          | 1.554796 | 0.000624 |
| Q9D9V3 | Echdc1        | Ethylmalonyl-CoA decarboxylase OS=Mus musculus GN=Echdc1 PE=1 SV=2                      | 1.547578 | 0.00466  |
| Q3T9U8 | Entpd2        | Putative uncharacterized protein OS=Mus musculus GN=Entpd2 PE=2 SV=1                    | 1.539953 | 0.000236 |
| Q9D486 | Cmip          | C-Maf-inducing protein OS=Mus musculus GN=Cmip PE=1 SV=3                                | 1.512938 | 0.023893 |
| P16015 | Ca3           | Carbonic anhydrase 3 OS=Mus musculus GN=Ca3 PE=1 SV=3                                   | 1.511782 | 0.025686 |
| J3QJX6 | 7530416G11Rik | Protein 7530416G11Rik OS=Mus musculus GN=7530416G11Rik PE=4 SV=1                        | 1.508008 | 0.007932 |
| P11087 | Colla1        | Collagen alpha-1(I) chain OS=Mus musculus GN=Colla1 PE=1 SV=4                           | 1.507353 | 0.022273 |
| Q3UKR1 | Dcn           | Decorin OS=Mus musculus GN=Dcn PE=1 SV=1                                                | 1.500471 | 5.61E-05 |

|            |          |                                                                                          |          |          |
|------------|----------|------------------------------------------------------------------------------------------|----------|----------|
| P48024     | Eif1     | Eukaryotic translation initiation factor 1 OS=Mus musculus GN=Eif1 PE=1 SV=2             | 0.665893 | 0.01209  |
| P50518     | Atp6v1e1 | V-type proton ATPase subunit E 1 OS=Mus musculus GN=Atp6v1e1 PE=1 SV=2                   | 0.665278 | 0.019672 |
| Q5EBQ6     | Rp19     | MCG10266, isoform CRA_a OS=Mus musculus GN=Rp19 PE=1 SV=1                                | 0.661645 | 0.003201 |
| Q3TJJ6     | #N/A     | Ferritin OS=Mus musculus PE=2 SV=1                                                       | 0.660886 | 0.03792  |
| E9PZFO     | Gm20390  | Nucleoside diphosphate kinase OS=Mus musculus GN=Gm20390 PE=3 SV=1                       | 0.654797 | 0.017303 |
| Q3UJX2     | Ctnnb11  | Putative uncharacterized protein OS=Mus musculus GN=Ctnnb11 PE=2 SV=1                    | 0.654774 | 0.00156  |
| Q3UJR3     | Htra2    | Putative uncharacterized protein OS=Mus musculus GN=Htra2 PE=2 SV=1                      | 0.654442 | 0.005789 |
| Q08189     | Tgm3     | Protein-glutamine gamma-glutamyltransferase E OS=Mus musculus GN=Tgm3 PE=1 SV=2          | 0.654181 | 0.000431 |
| Q5SF07     | Igf2bp2  | Insulin-like growth factor 2 mRNA-binding protein 2 OS=Mus musculus GN=Igf2bp2 PE=1 SV=1 | 0.653552 | 0.017908 |
| Q3UK85     | Dctn5    | Putative uncharacterized protein OS=Mus musculus GN=Dctn5 PE=2 SV=1                      | 0.651784 | 0.011431 |
| Q497E9     | Rps8     | 40S ribosomal protein S8 OS=Mus musculus GN=Rps8 PE=1 SV=1                               | 0.651342 | 0.008769 |
| AOA1B0GSR7 | Krt10    | Keratin, type I cytoskeletal 10 OS=Mus musculus GN=Krt10 PE=4 SV=1                       | 0.647743 | 0.00024  |
| Q3V3Z6     | Nlrp10   | Putative uncharacterized protein OS=Mus musculus GN=Nlrp10 PE=2 SV=1                     | 0.645477 | 0.025691 |
| Q8CGR6     | Klk13    | Epidermal growth factor-binding protein type B OS=Mus musculus GN=Klk13 PE=1 SV=1        | 0.644475 | 0.003055 |
| Q63870     | Col17a1  | Collagen alpha-1(VII) chain OS=Mus musculus GN=Col17a1 PE=1 SV=3                         | 0.643207 | 0.00053  |

## Supplementary Material

|        |          |                                                                                                                               |          |          |
|--------|----------|-------------------------------------------------------------------------------------------------------------------------------|----------|----------|
| Q3TKJ1 | Bcat1    | Branched-chain-amino-acid aminotransferase OS=Mus musculus GN=Bcat1 PE=2 SV=1                                                 | 0.639099 | 0.01116  |
| Q3U6L3 | Glrx     | Glutaredoxin, isoform CRA_a OS=Mus musculus GN=Glrx PE=1 SV=1                                                                 | 0.636549 | 0.024876 |
| Q91WQ5 | Taf51    | TAF5-like RNA polymerase II p300/CBP-associated factor-associated factor 65 kDa subunit 5L OS=Mus musculus GN=Taf51 PE=2 SV=1 | 0.636364 | 0.000608 |
| B2RVP5 | H2afv    | Histone H2A OS=Mus musculus GN=H2afv PE=2 SV=1                                                                                | 0.634942 | 0.015851 |
| Q3TIT6 | Dnajb1   | Putative uncharacterized protein OS=Mus musculus GN=Dnajb1 PE=2 SV=1                                                          | 0.634851 | 0.024297 |
| P62965 | Crabp1   | Cellular retinoic acid-binding protein 1 OS=Mus musculus GN=Crabp1 PE=1 SV=2                                                  | 0.63387  | 0.0026   |
| F6XI62 | Rpl7     | 60S ribosomal protein L7 (Fragment) OS=Mus musculus GN=Rpl7 PE=1 SV=1                                                         | 0.632446 | 0.013962 |
| Q9JMG1 | Edf1     | Endothelial differentiation-related factor 1 OS=Mus musculus GN=Edf1 PE=1 SV=1                                                | 0.629384 | 0.008312 |
| Q61176 | Arg1     | Arginase-1 OS=Mus musculus GN=Arg1 PE=1 SV=1                                                                                  | 0.629312 | 0.006303 |
| Q8BT90 | Rps17    | Putative uncharacterized protein (Fragment) OS=Mus musculus GN=Rps17 PE=2 SV=1                                                | 0.627202 | 0.008872 |
| P35175 | Stfal    | Stefin-1 OS=Mus musculus GN=Stfal PE=3 SV=1                                                                                   | 0.62676  | 0.000987 |
| Q9CX86 | Hnrnpa0  | Heterogeneous nuclear ribonucleoprotein A0 OS=Mus musculus GN=Hnrnpa0 PE=1 SV=1                                               | 0.625791 | 0.002237 |
| Q7TNV0 | Dek      | Protein DEK OS=Mus musculus GN=Dek PE=1 SV=1                                                                                  | 0.625279 | 0.001043 |
| Q497J0 | BC100530 | MCG130175, isoform CRA_b OS=Mus musculus GN=BC100530 PE=1 SV=1                                                                | 0.620736 | 0.001019 |



|            |          |                                                                                                        |          |          |
|------------|----------|--------------------------------------------------------------------------------------------------------|----------|----------|
| 070200     | Aif1     | Allograft inflammatory factor 1 OS=Mus musculus GN=Aif1 PE=1 SV=1                                      | 0.615864 | 0.01212  |
| AOA1D5RM85 | Rpl18a   | 60S ribosomal protein L18a (Fragment) OS=Mus musculus GN=Rpl18a PE=1 SV=1                              | 0.612479 | 0.002626 |
| P84228     | Hist1h3b | Histone H3.2 OS=Mus musculus GN=Hist1h3b PE=1 SV=2                                                     | 0.612196 | 0.007319 |
| Q80VD1     | Fam98b   | Protein FAM98B OS=Mus musculus GN=Fam98b PE=1 SV=1                                                     | 0.610088 | 0.001581 |
| Q58EA6     | Rps25    | MCG10725, isoform CRA_a OS=Mus musculus GN=Rps25 PE=1 SV=1                                             | 0.609779 | 0.013734 |
| Q8CF89     | Tab1     | TGF-beta-activated kinase 1 and MAP3K7-binding protein 1 OS=Mus musculus GN=Tab1 PE=1 SV=2             | 0.608974 | 0.028342 |
| P63163     | Snrpn    | Small nuclear ribonucleoprotein-associated protein N OS=Mus musculus GN=Snrpn PE=1 SV=1                | 0.608527 | 0.004916 |
| Q9CQH1     | Teddm3   | Protein Teddm3 OS=Mus musculus GN=Teddm3 PE=2 SV=1                                                     | 0.607219 | 0.007858 |
| Q91VE3     | Klk7     | Kallikrein-7 OS=Mus musculus GN=Klk7 PE=2 SV=1                                                         | 0.60663  | 0.004321 |
| Q99K30     | Eps812   | Epidermal growth factor receptor kinase substrate 8-like protein 2 OS=Mus musculus GN=Eps812 PE=1 SV=1 | 0.599106 | 0.03257  |
| Q5FWX6     | Prkd3    | Serine/threonine-protein kinase OS=Mus musculus GN=Prkd3 PE=1 SV=1                                     | 0.59707  | 0.014584 |
| 035704     | Sptlc1   | Serine palmitoyltransferase 1 OS=Mus musculus GN=Sptlc1 PE=1 SV=2                                      | 0.585366 | 0.036854 |
| E9QAZ2     | Gm10020  | Ribosomal protein L15 OS=Mus musculus GN=Gm10020 PE=3 SV=1                                             | 0.585335 | 0.000696 |
| Q7TNC4     | Luc712   | Putative RNA-binding protein Luc7-like 2 OS=Mus musculus GN=Luc712 PE=1 SV=1                           | 0.583698 | 6.99E-06 |
| Q62159     | Rhoc     | Rho-related GTP-binding protein RhoC OS=Mus musculus GN=Rhoc PE=1 SV=2                                 | 0.574675 | 0.042721 |

## Supplementary Material

|        |          |                                                                                                                                                  |          |          |
|--------|----------|--------------------------------------------------------------------------------------------------------------------------------------------------|----------|----------|
| P62918 | Rpl8     | 60S ribosomal protein L8 OS=Mus musculus<br>GN=Rpl8 PE=1 SV=2                                                                                    | 0.571247 | 0.009997 |
| F8WJ23 | Hrnr     | Hornerin OS=Mus musculus GN=Hrnr PE=1<br>SV=1                                                                                                    | 0.570151 | 0.01297  |
| 088986 | Gcat     | 2-amino-3-ketobutyrate coenzyme A<br>ligase, mitochondrial OS=Mus musculus<br>GN=Gcat PE=1 SV=2                                                  | 0.560795 | 0.039653 |
| Q8CB27 | Yod1     | Ubiquitin thioesterase OTU1 OS=Mus<br>musculus GN=Yod1 PE=1 SV=1                                                                                 | 0.5607   | 0.003363 |
| P50446 | Krt6a    | Keratin, type II cytoskeletal 6A OS=Mus<br>musculus GN=Krt6a PE=1 SV=3                                                                           | 0.559059 | 0.000238 |
| 009131 | Gstol    | Glutathione S-transferase omega-1 OS=Mus<br>musculus GN=Gstol PE=1 SV=2                                                                          | 0.557021 | 0.000667 |
| Q149U6 | I11f6    | Interleukin 1 family, member 6 OS=Mus<br>musculus GN=I11f6 PE=2 SV=1                                                                             | 0.55594  | 0.00869  |
| P24472 | Gsta4    | Glutathione S-transferase A4 OS=Mus<br>musculus GN=Gsta4 PE=1 SV=3                                                                               | 0.554728 | 0.02225  |
| Q9CQ79 | Txndc9   | Thioredoxin domain-containing protein 9<br>OS=Mus musculus GN=Txndc9 PE=1 SV=1                                                                   | 0.549148 | 0.025765 |
| A2RSX5 | Serpina9 | Serine (Or cysteine) peptidase<br>inhibitor, clade A (Alpha-1<br>antiproteinase, antitrypsin), member 9<br>OS=Mus musculus GN=Serpina9 PE=2 SV=1 | 0.548054 | 0.001529 |
| P62858 | Rps28    | 40S ribosomal protein S28 OS=Mus<br>musculus GN=Rps28 PE=1 SV=1                                                                                  | 0.53777  | 0.001374 |
| P97347 | Rptn     | Repetin OS=Mus musculus GN=Rptn PE=2<br>SV=2                                                                                                     | 0.536662 | 0.003052 |
| Q14A95 | Rbm7     | MCG9666, isoform CRA_d OS=Mus musculus<br>GN=Rbm7 PE=1 SV=1                                                                                      | 0.536101 | 0.002954 |
| Q925B0 | Pawr     | PRKC apoptosis WT1 regulator protein<br>OS=Mus musculus GN=Pawr PE=1 SV=2                                                                        | 0.531991 | 0.028448 |

|        |         |                                                                                             |          |          |
|--------|---------|---------------------------------------------------------------------------------------------|----------|----------|
| Q9CQK2 | Rps24   | 40S ribosomal protein S24 OS=Mus musculus GN=Rps24 PE=2 SV=1                                | 0.529042 | 0.002714 |
| Q3TRJ4 | Krt26   | Keratin, type I cytoskeletal 26 OS=Mus musculus GN=Krt26 PE=2 SV=1                          | 0.521244 | 0.001841 |
| P47963 | Rpl13   | 60S ribosomal protein L13 OS=Mus musculus GN=Rpl13 PE=1 SV=3                                | 0.521222 | 0.002965 |
| Q3UW40 | Rpl24   | Putative uncharacterized protein OS=Mus musculus GN=Rpl24 PE=2 SV=1                         | 0.519264 | 0.006741 |
| B2RT71 | Csta1   | Cystatin A OS=Mus musculus GN=Csta1 PE=2 SV=1                                               | 0.517814 | 0.003277 |
| Q6ZWX1 | Rpl35a  | MCG1036414 OS=Mus musculus GN=Rpl35a PE=1 SV=1                                              | 0.510879 | 0.001016 |
| Q3UP23 | Tmem26  | Transmembrane protein 26 OS=Mus musculus GN=Tmem26 PE=2 SV=2                                | 0.508606 | 0.021886 |
| P19001 | Krt19   | Keratin, type I cytoskeletal 19 OS=Mus musculus GN=Krt19 PE=1 SV=1                          | 0.491304 | 0.006896 |
| Q5BLJ9 | Rpl27   | 60S ribosomal protein L27 OS=Mus musculus GN=Rpl27 PE=1 SV=1                                | 0.490454 | 0.002805 |
| Q8C2Q7 | Hnrnph1 | Heterogeneous nuclear ribonucleoprotein H OS=Mus musculus GN=Hnrnph1 PE=1 SV=1              | 0.489125 | 0.005234 |
| F6YVP7 | Gm10260 | Protein Gm10260 OS=Mus musculus GN=Gm10260 PE=3 SV=2                                        | 0.47389  | 0.002019 |
| Q62150 | Rnps1   | RNA/DNA-binding protein OS=Mus musculus GN=Rnps1 PE=2 SV=1                                  | 0.470707 | 0.021117 |
| Q60760 | Grb10   | Growth factor receptor-bound protein 10 OS=Mus musculus GN=Grb10 PE=1 SV=2                  | 0.465816 | 0.004425 |
| Q80Z71 | Tnn     | Tenascin-N OS=Mus musculus GN=Tnn PE=1 SV=2                                                 | 0.442065 | 9.20E-05 |
| Q3TAA7 | Stk11ip | Serine/threonine-protein kinase 11-interacting protein OS=Mus musculus GN=Stk11ip PE=1 SV=1 | 0.429104 | 0.039768 |

## Supplementary Material

|            |           |                                                                     |          |          |
|------------|-----------|---------------------------------------------------------------------|----------|----------|
| P14115     | Rpl27a    | 60S ribosomal protein L27a OS=Mus musculus GN=Rpl27a PE=1 SV=5      | 0.422836 | 0.000153 |
| AOA0A6YX26 | Rpl31     | 60S ribosomal protein L31 OS=Mus musculus GN=Rpl31 PE=1 SV=1        | 0.422645 | 0.003188 |
| G3UWD7     | Gm10269   | MCG123152 OS=Mus musculus GN=Gm10269 PE=1 SV=1                      | 0.405022 | 0.001514 |
| Q9CWK0     | Rpl14     | Putative uncharacterized protein OS=Mus musculus GN=Rpl14 PE=2 SV=1 | 0.351093 | 0.00052  |
| AOA140T8K6 | Rpl36-ps3 | 60S ribosomal protein L36 OS=Mus musculus GN=Rpl36-ps3 PE=3 SV=1    | 0.308702 | 0.00456  |
| QOVDR7     | Krt6b     | Krt6b protein OS=Mus musculus GN=Krt6b PE=2 SV=1                    | 0.300013 | 6.05E-05 |
| Q6NXX2     | Rnase4    | Rnase4 protein OS=Mus musculus GN=Rnase4 PE=2 SV=1                  | 0.299113 | 0.000681 |
| C6EQJ5     | #N/A      | ASL1/3110003A17Rik fusion protein OS=Mus musculus PE=2 SV=1         | 0.296389 | 0.000416 |
| P61255     | Rpl26     | 60S ribosomal protein L26 OS=Mus musculus GN=Rpl26 PE=1 SV=1        | 0.215309 | 5.84E-05 |
| AOA0G2JEK2 | Crip1     | Cysteine-rich protein 1 OS=Mus musculus GN=Crip1 PE=1 SV=1          | 0.203902 | 0.003853 |

FC: Fold change
